# Supplementary material for: The Association Between Financial Toxicity and Treatment Regret in Men With Localized Prostate Cancer
Source: PubMed Central journal article supplement (PMC9731205; doi:10.1093/jncics/pkac071), 2022-10-18
Supplement: pkac071_supplementary_data.pdf [file pkac071_supplementary_data.pdf]

**SUPPLEMENTARY MATERIAL:**

**Supplementary Table 1:** Financial burden assessment instrument.

|                                                                                                                     |                                                                                                              |
|---------------------------------------------------------------------------------------------------------------------|--------------------------------------------------------------------------------------------------------------|
| Overall, how much of a burden is your having prostate cancer on you and your family in each of the following areas? |                                                                                                              |
| Our finances in general                                                                                             | -Very large burden<br>-Large burden<br>-Feel neutral<br>-Small burden<br>-Very small burden<br>-Not a burden |
| Our finances due to the cost of my treatment                                                                        | -Very large burden<br>-Large burden<br>-Feel neutral<br>-Small burden<br>-Very small burden<br>-Not a burden |
| Our finances due to the other costs of health care for prostate cancer (such as visits to the doctor, etc.)         | -Very large burden<br>-Large burden<br>-Feel neutral<br>-Small burden<br>-Very small burden<br>-Not a burden |
| Our finances due to the cost of my health insurance because I have prostate cancer                                  | -Very large burden<br>-Large burden<br>-Feel neutral<br>-Small burden<br>-Very small burden<br>-Not a burden |

**Supplementary Table 2:** Multivariable longitudinal logistic regression of the association between financial burden from “treatment costs” and treatment regret after adjusting for potential confounders.

|                                                         | aOR (95% CI)       | p value |
|---------------------------------------------------------|--------------------|---------|
| <b>Burden from treatment costs</b>                      |                    |         |
| At 3-year survey                                        | 1.02 (0.47, 2.21)  | 0.96    |
| At 5-year survey                                        | 0.78 (0.34, 1.82)  | 0.6     |
| <b>Characteristics at baseline<sup>1</sup></b>          |                    |         |
| Age at diagnosis                                        | 0.99 (0.76, 1.30)  | 0.9     |
| Race and ethnicity (ref: non-Black*)                    | 0.99 (0.68, 1.44)  | 0.96    |
| Income (ref: < \$30,000)                                |                    |         |
| \$30,001 - \$50,000                                     | 1.00 (0.68, 1.490) | 0.99    |
| \$50,001 - \$100,000                                    | 0.86 (0.57, 1.30)  | 0.5     |
| > \$100,000                                             | 0.80 (0.50, 1.26)  | 0.3     |
| Employment (ref: unemployed)                            |                    |         |
| Full time                                               | 0.63 (0.37, 1.08)  | 0.09    |
| Part time                                               | 0.63 (0.33, 1.20)  | 0.2     |
| Retired                                                 | 0.70 (0.40, 1.23)  | 0.2     |
| Insurance (ref: VA/Military/Medicaid/Other/None)        |                    |         |
| Medicare                                                | 0.70 (0.39, 1.26)  | 0.2     |
| Private/HMO                                             | 0.83 (0.47, 1.47)  | 0.5     |
| College graduate or above (ref: some college and below) | 0.72 (0.55, 0.95)  | 0.02    |
| Marital status (ref: not married)                       | 0.71 (0.52, 0.98)  | 0.04    |
| Comorbidity Score (ref: 0-2)                            |                    |         |
| 3 - 4                                                   | 1.23 (0.91, 1.66)  | 0.2     |
| 5 or more                                               | 1.35 (0.97, 1.90)  | 0.07    |
| D’Amico risk group (ref: Low risk)                      |                    |         |
| Intermediate Risk                                       | 1.02 (0.77, 1.35)  | 0.9     |
| High Risk                                               | 0.83 (0.53, 1.29)  | 0.4     |
| Clinical stage T1 (ref: T2)                             | 1.08 (0.79, 1.48)  | 0.7     |
| Received any hormone therapy                            | 1.17 (0.76, 1.78)  | 0.5     |
| Prostate cancer treatment (ref: Active surveillance)    |                    |         |
| Surgery                                                 | 1.79 (1.13, 2.83)  | 0.01    |
| Radiation                                               | 1.14 (0.70, 1.85)  | 0.6     |
| Site (ref: LA)                                          |                    |         |
| Utah                                                    | 0.54 (0.33, 0.87)  | 0.01    |
| Atlanta                                                 | 0.90 (0.61, 1.32)  | 0.6     |
| Louisiana                                               | 0.70 (0.50, 0.97)  | 0.03    |
| NJ                                                      | 1.04 (0.73, 1.48)  | 0.8     |

| Patient reported functional outcomes at follow-up surveys <sup>2</sup>       |                    |        |
|------------------------------------------------------------------------------|--------------------|--------|
| EPIC-26 sexual function domain score change from baseline                    | 0.67 (0.57, 0.78)  | <0.001 |
| EPIC-26 urinary incontinence domain score change from baseline               | 0.98 (0.86, 1.12)  | 0.8    |
| EPIC-26 urinary irritative domain score change from baseline                 | 0.93 (0.80, 1.08)  | 0.3    |
| EPIC-26 bowel function domain score change from baseline                     | 1.01 (0.97, 1.05)  | 0.7    |
| EPIC-26 hormonal domain score change from baseline                           | 1.00 (0.91, 1.09)  | 0.97   |
| SF36 physical functioning change from baseline                               | 0.98 (0.92, 1.05)  | 0.6    |
| SF36 emotional well-being change from baseline                               | 0.99 (0.90, 1.10)  | 0.9    |
| SF36 energy and fatigue at change from baseline                              | 0.84 (0.71, 0.99)  | 0.04   |
| Perception of treatment effectiveness “a lot worse” compared to expectations | 5.92 (3.07, 11.42) | <0.001 |
| Perception of treatment side effects “a lot worse” compared to expectations  | 6.00 (4.53, 7.95)  | <0.001 |

<sup>1</sup>: Comparison is between the first quartile and the third quartile for continuous variables.

<sup>2</sup>: For all EPIC-26 domain score and SF36 score changes, the reported effects were for comparing the upper quartiles (more improving/less worsening) to the lower quartiles (less improving/more worsening) in domain score changes. For example, for the sexual domain, the comparison was between 0 (no change) and -42 (42-point worsening). For the SF36 emotional well-being, the comparison was between 8 (improving) and -4 (worsening).

\*non-Black race and ethnicities included: Asian/Oriental/Pacific islander, American Indian/Native Alaskan, Latino/Hispanic/Mexican-American, white/Caucasian, and patient-reported responses of “other.”

**Supplementary Table 3:** Multivariable longitudinal logistic regression of the association between financial burden from “healthcare costs” and treatment regret after adjusting for potential confounders.

|                                                         | aOR (95% CI)      | p value |
|---------------------------------------------------------|-------------------|---------|
| <b>Burden from other healthcare costs</b>               |                   |         |
| At 3-year survey                                        | 1.85 (0.92, 3.72) | 0.08    |
| At 5-year survey                                        | 1.62 (0.77, 3.41) | 0.2     |
| <b>Characteristics at baseline<sup>1</sup></b>          |                   |         |
| Age at diagnosis                                        | 1.00 (0.77, 1.30) | 0.99    |
| Race and ethnicity (ref: non-Black*)                    | 0.99 (0.67, 1.44) | 0.94    |
| Income (ref: < \$30,000)                                |                   |         |
| \$30,001 - \$50,000                                     | 1.06 (0.71, 1.59) | 0.8     |
| \$50,001 - \$100,000                                    | 0.93 (0.61, 1.40) | 0.7     |
| > \$100,000                                             | 0.87 (0.55, 1.38) | 0.6     |
| Employment (ref: unemployed)                            |                   |         |
| Full time                                               | 0.65 (0.38, 1.11) | 0.1     |
| Part time                                               | 0.65 (0.34, 1.24) | 0.2     |
| Retired                                                 | 0.73 (0.42, 1.28) | 0.3     |
| Insurance (ref: VA/Military/Medicaid/Other/None)        |                   |         |
| Medicare                                                | 0.69 (0.38, 1.24) | 0.2     |
| Private/HMO                                             | 0.82 (0.47, 1.44) | 0.5     |
| College graduate or above (ref: some college and below) | 0.72 (0.54, 0.95) | 0.02    |
| Marital status (ref: not married)                       | 0.72 (0.52, 0.98) | 0.04    |
| Comorbidity Score (ref: 0-2)                            |                   |         |
| 3 - 4                                                   | 1.20 (0.88, 1.62) | 0.2     |
| 5 or more                                               | 1.30 (0.93, 1.81) | 0.1     |
| D’Amico risk group (ref: Low risk)                      |                   |         |
| Intermediate Risk                                       | 1.01 (0.76, 1.34) | 0.95    |
| High Risk                                               | 0.81 (0.52, 1.26) | 0.4     |
| Clinical stage T1 (ref: T2)                             | 1.07 (0.78, 1.47) | 0.7     |
| Received any hormone therapy                            | 1.15 (0.75, 1.76) | 0.5     |
| Prostate cancer treatment (ref: Active surveillance)    |                   |         |
| Surgery                                                 | 1.75 (1.10, 2.76) | 0.02    |
| Radiation                                               | 1.10 (0.68, 1.80) | 0.7     |
| Site (ref: LA)                                          |                   |         |
| Utah                                                    | 0.53 (0.33, 0.85) | 0.01    |
| Atlanta                                                 | 0.88 (0.60, 1.29) | 0.5     |
| Louisiana                                               | 0.69 (0.50, 0.96) | 0.03    |
| NJ                                                      | 1.00 (0.71, 1.43) | 0.98    |

| Patient reported functional outcomes at follow-up surveys <sup>2</sup>       |                    |        |
|------------------------------------------------------------------------------|--------------------|--------|
| EPIC-26 sexual function domain score change from baseline                    | 0.67 (0.57, 0.79)  | <0.001 |
| EPIC-26 urinary incontinence domain score change from baseline               | 0.98 (0.86, 1.11)  | 0.7    |
| EPIC-26 urinary irritative domain score change from baseline                 | 0.94 (0.81, 1.09)  | 0.4    |
| EPIC-26 bowel function domain score change from baseline                     | 1.01 (0.97, 1.05)  | 0.7    |
| EPIC-26 hormonal domain score change from baseline                           | 1.00 (0.92, 1.10)  | 0.9    |
| SF36 physical functioning change from baseline                               | 0.98 (0.92, 1.04)  | 0.5    |
| SF36 emotional well-being change from baseline                               | 0.99 (0.90, 1.09)  | 0.8    |
| SF36 energy and fatigue at change from baseline                              | 0.85 (0.72, 1.00)  | 0.05   |
| Perception of treatment effectiveness “a lot worse” compared to expectations | 5.79 (2.98, 11.21) | <0.001 |
| Perception of treatment side effects “a lot worse” compared to expectations  | 5.99 (4.53, 7.94)  | <0.001 |

<sup>1</sup>: Comparison is between the first quartile and the third quartile for continuous variables.

<sup>2</sup>: For all EPIC-26 domain score and SF36 score changes, the reported effects were for comparing the upper quartiles (more improving/less worsening) to the lower quartiles (less improving/more worsening) in domain score changes. For example, for the sexual domain, the comparison was between 0 (no change) and -42 (42-point worsening). For the SF36 emotional well-being, the comparison was between 8 (improving) and -4 (worsening).

\*non-Black race and ethnicities included: Asian/Oriental/Pacific islander, American Indian/Native Alaskan, Latino/Hispanic/Mexican-American, white/Caucasian, and patient-reported responses of “other.”

**Supplementary Table 4:** Multivariable longitudinal logistic regression of the association between financial burden from “health insurance costs” and treatment regret after adjusting for potential confounders.

|                                                         | aOR (95% CI)      | p value |
|---------------------------------------------------------|-------------------|---------|
| <b>Burden from health insurance</b>                     |                   |         |
| At 3-year survey                                        | 1.71 (0.89, 3.30) | 0.1     |
| At 5-year survey                                        | 1.34 (0.63, 2.86) | 0.5     |
| <b>Characteristics at baseline<sup>1</sup></b>          |                   |         |
| Age at diagnosis                                        | 0.99 (0.76, 1.29) | 0.9     |
| Race and ethnicity (ref: non-Black*)                    | 1.00 (0.68, 1.45) | 0.98    |
| Income (ref: < \$30,000)                                |                   |         |
| \$30,001 - \$50,000                                     | 1.07 (0.72, 1.59) | 0.7     |
| \$50,001 - \$100,000                                    | 0.93 (0.61, 1.40) | 0.7     |
| > \$100,000                                             | 0.87 (0.55, 1.37) | 0.5     |
| Employment (ref: unemployed)                            |                   |         |
| Full time                                               | 0.64 (0.37, 1.08) | 0.1     |
| Part time                                               | 0.64 (0.33, 1.21) | 0.2     |
| Retired                                                 | 0.71 (0.41, 1.25) | 0.2     |
| Insurance (ref: VA/Military/Medicaid/Other/None)        |                   |         |
| Medicare                                                | 0.69 (0.39, 1.24) | 0.2     |
| Private/HMO                                             | 0.81 (0.46, 1.43) | 0.5     |
| College graduate or above (ref: some college and below) | 0.72 (0.54, 0.95) | 0.02    |
| Marital status (ref: not married)                       | 0.73 (0.53, 1.00) | 0.05    |
| Comorbidity Score (ref: 0-2)                            |                   |         |
| 4-Mar                                                   | 1.20 (0.89, 1.62) | 0.2     |
| 5 or more                                               | 1.31 (0.94, 1.84) | 0.1     |
| D’Amico risk group (ref: Low risk)                      |                   |         |
| Intermediate Risk                                       | 1.01 (0.76, 1.33) | 0.96    |
| High Risk                                               | 0.80 (0.52, 1.25) | 0.3     |
| Clinical stage T1 (ref: T2)                             | 1.05 (0.77, 1.45) | 0.8     |
| Received any hormone therapy                            | 1.13 (0.73, 1.74) | 0.6     |
| Prostate cancer treatment (ref: Active surveillance)    |                   |         |
| Surgery                                                 | 1.73 (1.10, 2.74) | 0.02    |
| Radiation                                               | 1.10 (0.68, 1.79) | 0.7     |
| Site (ref: LA)                                          |                   |         |
| Utah                                                    | 0.51 (0.31, 0.82) | 0.01    |
| Atlanta                                                 | 0.87 (0.60, 1.28) | 0.5     |
| Louisiana                                               | 0.69 (0.49, 0.96) | 0.03    |
| NJ                                                      | 0.99 (0.70, 1.42) | 0.97    |

| Patient reported functional outcomes at follow-up surveys <sup>2</sup>       |                    |        |
|------------------------------------------------------------------------------|--------------------|--------|
| EPIC-26 sexual function domain score change from baseline                    | 0.67 (0.57, 0.78)  | <0.001 |
| EPIC-26 urinary incontinence domain score change from baseline               | 0.98 (0.86, 1.11)  | 0.7    |
| EPIC-26 urinary irritative domain score change from baseline                 | 0.94 (0.81, 1.09)  | 0.4    |
| EPIC-26 bowel function domain score change from baseline                     | 1.01 (0.97, 1.05)  | 0.7    |
| EPIC-26 hormonal domain score change from baseline                           | 1.00 (0.91, 1.09)  | 0.99   |
| SF36 physical functioning change from baseline                               | 0.98 (0.91, 1.04)  | 0.5    |
| SF36 emotional well-being change from baseline                               | 0.99 (0.89, 1.09)  | 0.8    |
| SF36 energy and fatigue at change from baseline                              | 0.85 (0.72, 1.00)  | 0.05   |
| Perception of treatment effectiveness “a lot worse” compared to expectations | 5.77 (2.97, 11.22) | <0.001 |
| Perception of treatment side effects “a lot worse” compared to expectations  | 6.00 (4.53, 7.95)  | <0.001 |

<sup>1</sup>: Comparison is between the first quartile and the third quartile for continuous variables.

<sup>2</sup>: For all EPIC-26 domain score and SF36 score changes, the reported effects were for comparing the upper quartiles (more improving/less worsening) to the lower quartiles (less improving/more worsening) in domain score changes. For example, for the sexual domain, the comparison was between 0 (no change) and -42 (42-point worsening). For the SF36 emotional well-being, the comparison was between 8 (improving) and -4 (worsening).

\*non-Black race and ethnicities included: Asian/Oriental/Pacific islander, American Indian/Native Alaskan, Latino/Hispanic/Mexican-American, white/Caucasian, and patient-reported responses of “other.”

**Supplementary Figure 1:** Survey administration schedule for assessment of functional outcomes (EPIC-26), financial burden (developed by study psychometrician), and treatment regret (instrument developed by Clark et al and validated in prostate cancer patients).

| Survey           | Baseline | 6 months | 1 year | 3 years | 5 years |
|------------------|----------|----------|--------|---------|---------|
| EPIC-26          | x        | x        | x      | x       | x       |
| Financial Burden | x        | x        | x      | x       | x       |
| Treatment Regret |          |          |        | x       | x       |
